# Supplementary material for: Tunable SERS using gold nanoaggregates on an elastomeric substrate
Source: Royal Society of Chemistry journal article supplement (doi:10.1039/c3nr03021k), 2013-01-01
Supplement: c3nr03021k.pdf [file c3nr03021k.pdf]

## Supplementary Information for “Tunable SERS using Gold Nanoaggregates on an Elastomeric Substrate”

M. Kamal Hossain,<sup>ab†</sup> Geoff R. Willmott,<sup>\*ab</sup> Pablo G. Etchegoin,<sup>ac</sup> Richard J. Blaikie,<sup>ad‡</sup> and  
Jeffery L. Tallon<sup>ab</sup>

<sup>a</sup> The MacDiarmid Institute for Advanced Materials and Nanotechnology

<sup>b</sup> Callaghan Innovation, 69 Gracefield Rd, Lower Hutt, New Zealand

<sup>c</sup> School of Chemical and Physical Sciences, Victoria University of Wellington, Wellington, New Zealand

<sup>d</sup> Department of Electrical and Computer Engineering, University of Canterbury, Christchurch, New Zealand

<sup>†</sup> Present address: King Fahd University of Petroleum and Minerals, Dhahran, Saudi Arabia

<sup>‡</sup> Present address: Department of Physics, University of Otago, Dunedin, New Zealand

\*Corresponding author

Email: [geoff.willmott@callaghaninnovation.govt.nz](mailto:geoff.willmott@callaghaninnovation.govt.nz)

Phone: (64) (0)4 931 3220

Fax: (64) (0)4 931 3754

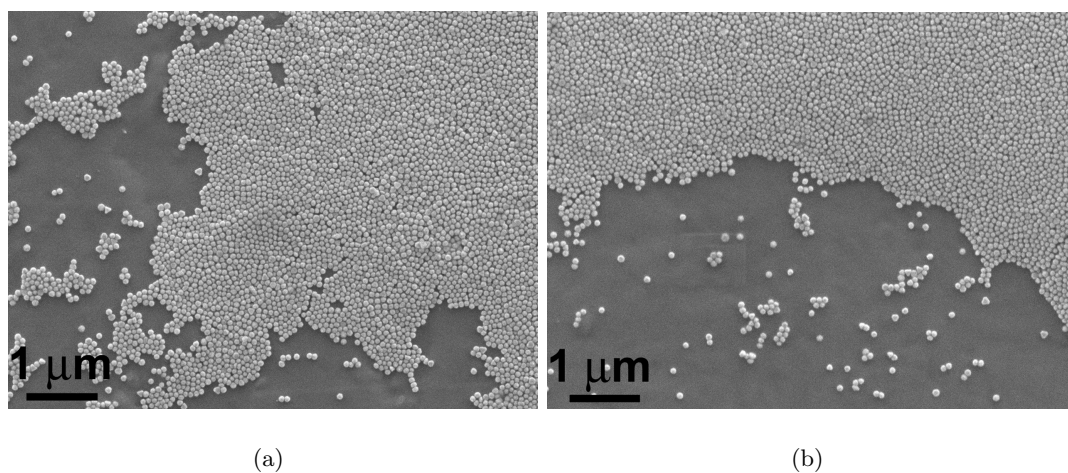

FIG. 1: Further SEM imaging (JEOL JSM-6500F SEM, accelerating voltage 3 kV) of gold nanoparticles deposited on an thermoplastic polyurethane substrate, using the deposition method described in the main text.

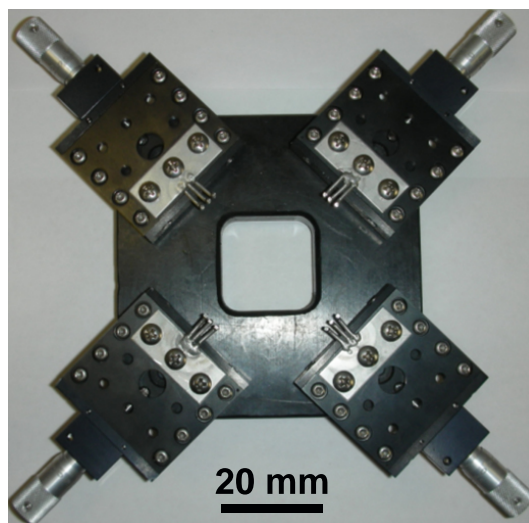

FIG. 2: The customised stage used for controlled application of macroscopic strain to the elastomeric specimens, including during AFM and SERS measurements. Each micrometer stage was fitted with teeth which fitted into the holes on the legs of the specimens.

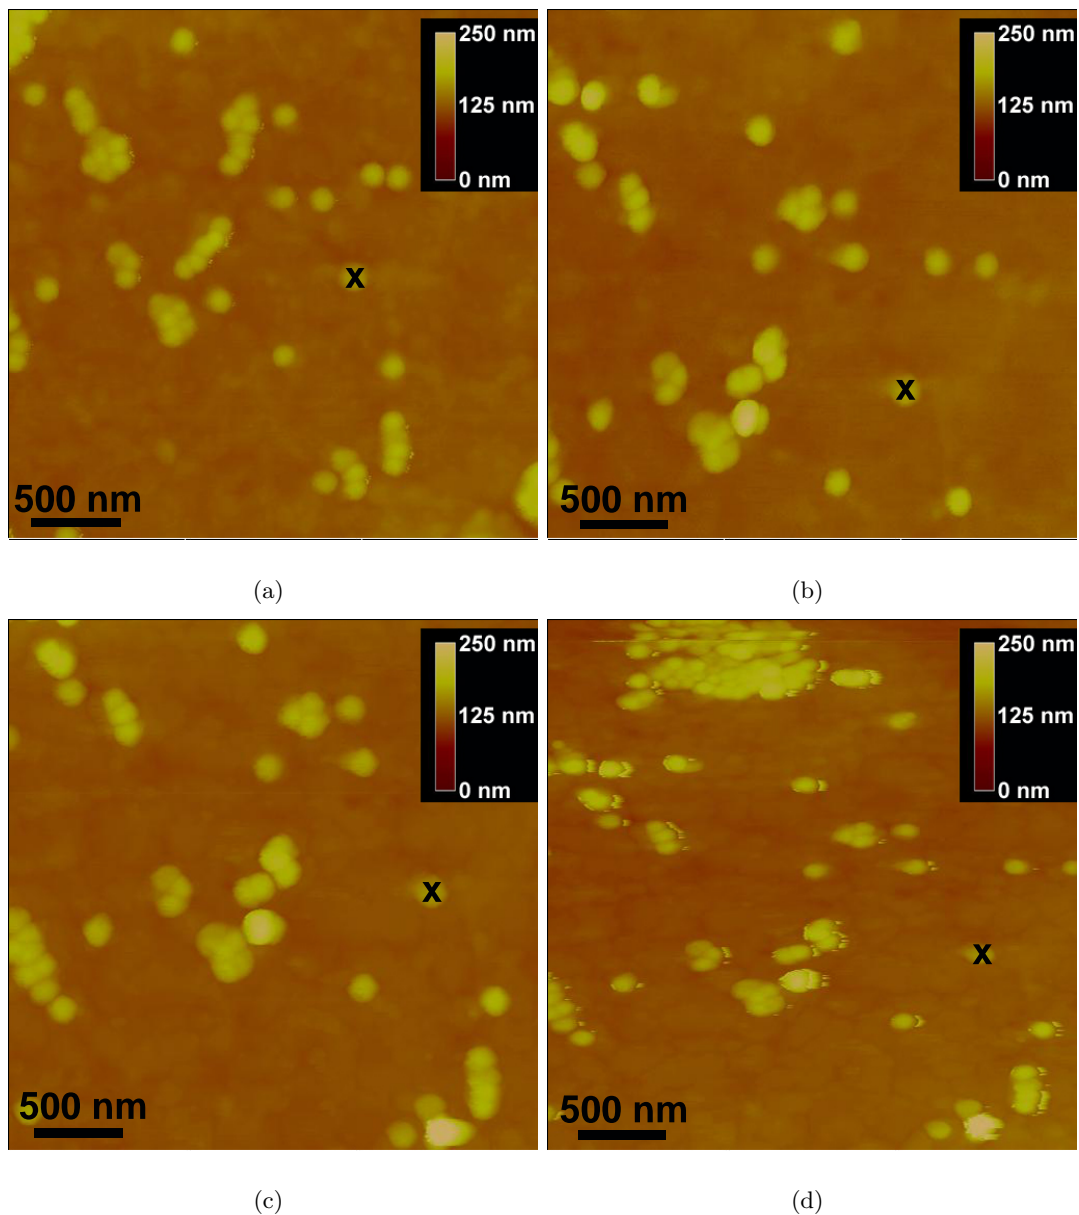

FIG. 3: AFM images showing a specific region of gold nanoparticles deposited on a thermoplastic polyurethane membrane, obtained using a Digital Instruments Dimension 3100 atomic force microscope in tapping mode. These images were used to collect ‘Set 1’ data in Fig. 2(b) of the main text. The applied stretches in (a)-(d) were  $\alpha = 0$ , 0.17, 0.36 and 0.48 respectively. The nanoparticle indicated by an “x” is the same in each image.

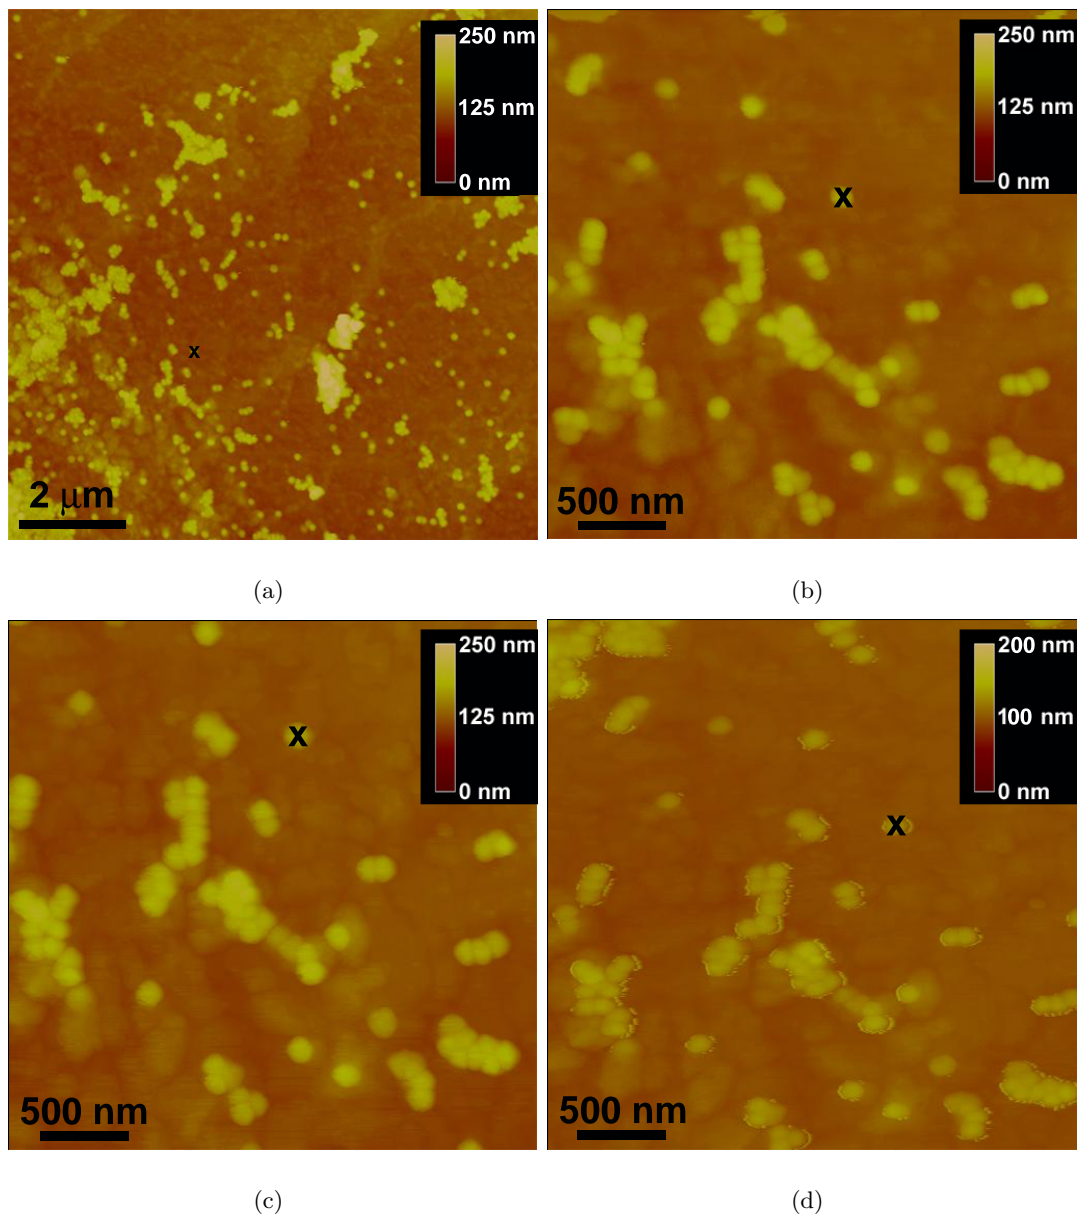

FIG. 4: AFM images for a further specific region of gold nanoparticles deposited on a thermoplastic polyurethane membrane (distinct from Fig. 3). These images were used to collect ‘Set 2’ data in Fig. 2(b) of the main text. The applied stretches in (a)-(d) were  $\alpha = 0, 0.17, 0.36$  and  $0.48$  respectively. The nanoparticle indicated by an “x” is the same in each image.

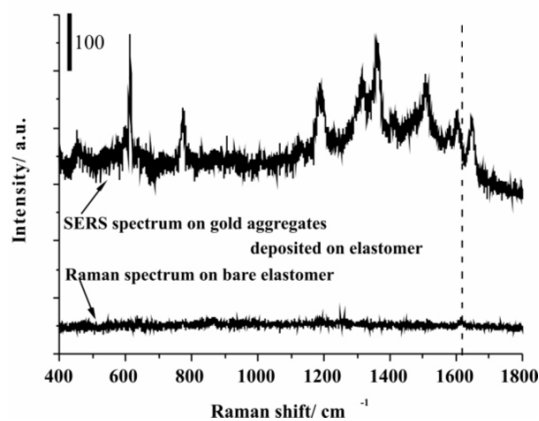

FIG. 5: Far field SERS signals obtained on a static membrane using a triple spectrometer (T64000, Jobin-Yvon) with 647 nm lines from a Kr<sup>+</sup> laser. Signals were collected with 60 s exposure time and  $\sim 100 \mu\text{W}$  laser power at the sample surface. The signal for R6G (e.g. at  $610 \text{ cm}^{-1}$ ) was enhanced in the presence of gold aggregates, whereas the most prominent feature for the bare elastomer is near  $1610 \text{ cm}^{-1}$ , indicated by the vertical dotted line.

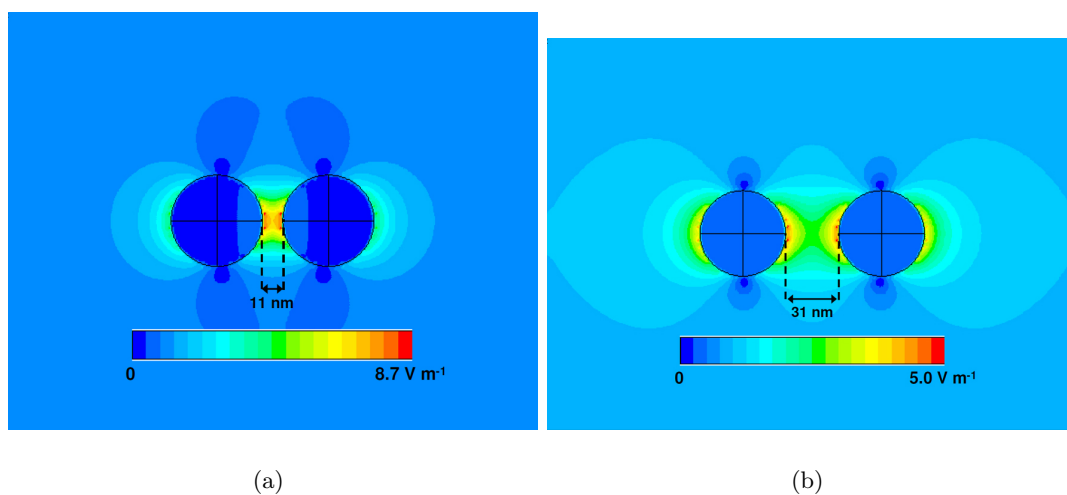

FIG. 6: Near electric field distributions (S-polarization for 633 nm excitation) for a dimer of 50 nm gold spheres, calculated using Plank finite difference time domain software. Dimer separation  $g$  is (a) 11 nm and (b) 31 nm, representing the extreme simulated values.
